# ATP Release from Vascular Endothelia Occurs Across Cx43 Hemichannels and Is Attenuated during Hypoxia

Marion Faigle<sup>1,9</sup>, Jessica Seessle<sup>1,9</sup>, Stephanie Zug<sup>1</sup>, Karim C. El Kasmi<sup>2</sup>, Holger K. Eltzschig<sup>1,2\*</sup>

**1** Department of Anesthesiology and Intensive Care Medicine, Tübingen University Hospital, Tübingen, Germany, **2** Mucosal Inflammation Program, Department of Anesthesiology and Perioperative Medicine, University of Colorado Health Science Center, Denver, Colorado, United States of America

## Abstract

**Background:** Extracellular ATP is an important signaling molecule for vascular adaptation to limited oxygen availability (hypoxia). Here, we pursued the contribution of vascular endothelia to extracellular ATP release under hypoxic conditions.

**Methodology, Principal Findings:** We gained first insight from studying ATP release from endothelia (HMEC-1) pre-exposed to hypoxia. Surprisingly, we found that ATP release was significantly attenuated following hypoxia exposure (2% oxygen, 22±3% after 48 h). In contrast, intracellular ATP was unchanged. Similarly, lactate-dehydrogenase release into the supernatants was similar between normoxic or hypoxic endothelia, suggesting that differences in lytic ATP release between normoxia or hypoxia are minimal. Next, we used pharmacological strategies to study potential mechanisms for endothelial-dependent ATP release (eg, verapamil, dipyridamole, 18- $\alpha$ -glycyrrhetic acid, anandamide, connexin-mimetic peptides). These studies revealed that endothelial ATP release occurs – at least in part – through connexin 43 (Cx43) hemichannels. A real-time RT-PCR screen of endothelial connexin expression showed selective repression of Cx43 transcript and additional studies confirmed time-dependent Cx43 mRNA, total and surface protein repression during hypoxia. In addition, hypoxia resulted in Cx43-serine368 phosphorylation, which is known to switch Cx43 hemi-channels from an open to a closed state.

**Conclusions/Significance:** Taken together, these studies implicate endothelial Cx43 in hypoxia-associated repression of endothelial ATP release.

**Citation:** Faigle M, Seessle J, Zug S, El Kasmi KC, Eltzschig HK (2008) ATP Release from Vascular Endothelia Occurs Across Cx43 Hemichannels and Is Attenuated during Hypoxia. PLoS ONE 3(7): e2801. doi:10.1371/journal.pone.0002801

**Editor:** Nils Cordes, Dresden University of Technology, Germany

**Received:** February 23, 2008; **Accepted:** July 5, 2008; **Published:** July 30, 2008

**Copyright:** © 2008 Faigle et al. This is an open-access article distributed under the terms of the Creative Commons Attribution License, which permits unrestricted use, distribution, and reproduction in any medium, provided the original author and source are credited.

**Funding:** This work was supported by grants from the German Research Foundation (DFG) (EL274/1 and EL274/4 to H.K.E.) and the Foundation for Anesthesia Research and Education (H.K.E.).

**Competing Interests:** The authors have declared that no competing interests exist.

\* E-mail: holger.eltzschig@uchsc.edu

<sup>9</sup> These authors contributed equally to this work.

## Introduction

Extracellular nucleotide and nucleoside levels are increased during conditions of limited oxygen availability (hypoxia) [1–17] and have been suggested in various aspects of physiological adaptation to hypoxia [1–3,5–9,16–19]. Particularly extracellular elevations of ATP are critical in vascular adaptation to hypoxia, as extracellular ATP can either signal directly to ATP receptors [20,21] or is rapidly converted to adenosine leading to increased vascular nucleoside signaling [22–27]. While previous studies have shown that during hypoxic conditions, adenosine stems mainly from ATP-phosphohydrolysis [7,8,26,28] cellular sources and mechanisms for extracellular ATP release during hypoxia are not well defined. As such, different cell types can contribute to elevations of vascular ATP during hypoxia, including circulating blood cells such as platelets, erythrocytes or inflammatory cells (e.g. PMN). [29] In addition, vascular endothelia may represent an important cellular source for extracellular ATP release during hypoxia [28] as they extend over a large surface area and are anatomically positioned at the interface between a hypoxic stimulus and the surrounding tissues [26].

At present, several studies have detailed different molecular mechanisms involved in cellular release of ATP into the

extracellular milieu. Such mechanisms differ between multiple cell types (e.g. platelets, astrocytes, umbrella cells of the bladder) [30]. For example, ATP release from umbrella cells of the bladder is dependent on mechanical pressure stimulation. This ATP release can be blocked by inhibitors of connexin hemichannels, ABC-protein family members, or nucleoside transporters [31]. Other studies on cellular mechanisms of ATP release found that ATP release from neuronal astrocytes involves the gap-junction molecule connexin 43 (Cx43) [32]. As such, Cx43 molecules can assemble to hexadimers (so called “connexons”) that form junctional connections between different cell types. In addition to their role as gap-junctional proteins, recent studies indicate that Cx43 connexons are also active in single plasma membranes and can function in intercellular signaling as ATP release channels [33]. As such, genetic and pharmacological studies of neutrophil-dependent ATP release suggest a critical role of Cx43-hemichannels in extracellular ATP release following inflammatory stimulation [29], which may play an important role in purinergic chemotaxis [34,35]. Similarly, a very recent study studied the contribution of Cx43 to ovarian follicle development in the mouse. The authors found that Cx43 is strongly expressed in granulosa

cells, in which it forms intercellular gap junction channels that couple the cells metabolically. However, recent evidence indicates that undocked gap junction hemichannels can also have physiological roles such as mediating the release of small messenger molecules, including ATP. In this study, the presence of undocked Cx43 hemichannels in granulosa cells was revealed by dye uptake induced either by mechanical stimulation or by the reduction of extracellular divalent cations, both of which are known triggers for hemichannel opening. ATP release was also detected, and could be abolished by connexin-channel blockers [36].

In the present study, we tested the hypothesis that vascular endothelia represent an important source for extracellular ATP elevation during hypoxic conditions. To our surprise, we found that extracellular ATP release from vascular endothelia is attenuated following hypoxia exposure. Additional studies to address molecular mechanisms of endothelial-dependent ATP release suggested a functional contribution of Cx43 in endothelial ATP release. Moreover, hypoxia exposure of endothelia revealed that Cx43 expression is attenuated by hypoxia, while Cx43-Serine368 phosphorylation status is increased, which has previously been shown to change the Cx43 channels from an open to a closed status [37]. These findings suggest that extracellular elevations of vascular ATP levels during hypoxia predominantly stem from other cell types than vascular endothelia (e.g. inflammatory cells, or red blood cells) [29,35,38,39].

## Materials and Methods

### Endothelial Cell Culture

Human microvascular endothelial cells (HMEC-1) were a kind gift of Francisco Candal, Centers for Disease Control, Atlanta, GA [40,41]. These cells are derived from dermal tissues and were harvested and cultured by a modification of methods described previously [9,23–25,29,42]. In brief, HMEC-1 were harvested with 0.1% trypsin and incubated at 37°C in 95% air/5% CO<sub>2</sub>. Culture medium was supplemented with heat-inactivated fetal bovine serum, penicillin, streptomycin, L-glutamine, epidermal growth factor, and hydrocortisone. In other studies, human umbilical vein endothelial cells (HUVECs) were cultured as described previously [26,43]. All experiments were carried out when cultured endothelial cells were fully confluent.

### Measurement of extracellular ATP release into the supernatant from HMEC-1

Confluent HMEC-1 monolayers were exposed to normoxia or indicated time periods of hypoxia (2% oxygen). These studies were carried out in the presence of the polyoxotungstate Na<sub>6</sub>[H<sub>2</sub>W<sub>12</sub>O<sub>40</sub>] (POM-1, 100 μM), a highly potent non-specific inhibitor of ecto-nucleoside triphosphate diphosphohydrolases [7]. The culture medium was removed, cells were washed twice and incubated as indicated in calcium containing HBSS, and samples from the supernatant were collected, shock frozen and stored at –80°C for further analysis. In subsets of experiments, intracellular ATP levels were measured. Here, confluent HMEC-1 monolayers were exposed to hypotonic lysis by addition of ice-cold water. Following centrifugation over for 5 min at 13,000 rpm, the ATP content in the supernatants was quantified using a highly sensitive luciferase based technique (CHRONO-LUME, Chrono-Log Corp., USA, Haverton). Luciferase activity was measured on a luminometer (Turner Designs Inc., Sunnyvale, California, USA) and compared with ATP standards [26,29].

### Measurement of lactate dehydrogenase (LDH) in supernatants from HMEC-1

To assess lytic ATP release, the cytotoxicity detection kit (Roche Diagnostics, Germany, Mannheim) was used according to the manufacturer's instructions.[29] In short, confluent HMEC-1 monolayers were exposed to normoxic or hypoxic (2% oxygen) conditions over indicated time periods, then 100 μl of the substrate mixture from the kit were added to 100 μl of the collected protein-free supernatant. After an incubation period of 30 min the absorbance was measured at 490 nm. In control studies, normoxic HMEC-1 were treated with 2% Triton X-100 to assess maximal LDH release.

### Pharmacological studies on mechanisms of endothelial-dependent ATP release

Confluent HMEC-1 were seeded on 6-well plates, culture medium was removed and cells were washed with calcium free 5 M HEPES HBSS. In subsets of experiments, HMEC-1 monolayers were pretreated over 10 min with 18-alpha-glycyrrhetic acid (18αGA; Sigma Aldrich, 20 μmol), Anandamide (Sigma Aldrich, 40 μmol) or the phosphokinase C inhibitor bisindolylmaleimide (BIM, Sigma Aldrich, 10 μM). Furthermore, the non specific ABC receptor antagonist Verapamil (Tocris Cookson, 10 μmol) and the inhibitor of equilibrative nucleoside transporters dipyridamole (Sigma Aldrich, 10 μmol) were used. In other studies, the effects of connexin mimetic peptides for connexin 43 (SRPTEKTIFII, Biosource, Germany, Solingen, 50 μmol) and connexin 40 (SRPTEKNVFIV, Biosource, Germany, Solingen, 50 μmol) were used (100 μM). After 30 min of incubation time at room temperature, ATP content within the supernatants was measured as described above. Connexin mimetic peptides that correspond to short specific sequences in the two extracellular loops of connexins are a class of benign, specific and reversible inhibitors of gap-junctional communication that have been studied recently in a broad range of cells, tissues and organs. The properties and uses of these short synthetic peptides, and their probable mechanism of action with those of a wide range of other less specific traditional gap-junction inhibitors have been recently reviewed [44].

### Transcriptional analysis

To assess the influence of hypoxia on endothelial connexin transcript levels, HMEC-1 monolayers were exposed to hypoxia (2% oxygen) over indicated time periods, followed by isolation of RNA and quantification of transcript levels by real-time RT-PCR (iCycler; Bio-Rad Laboratories Inc.). RNA was isolated by using Total RNA purification NucleoSpin RNA II according to the manufacturer's instructions (Macherey-Nagel, Germany, Düren). RNA concentration was measured followed by cDNA synthesis using the iScript cDNA Synthesis Kit (Bio-Rad Laboratories). The PCR reactions contained 10 pM sense and 10 pM antisense oligonucleotides with iQ SYBR Green Supermix (Bio-Rad Laboratories). The target sequence was amplified using increasing numbers of cycles of 95°C for 15 s, 56°C for 30 s, 72°C for 15 s as described previously [26,42]. Realtime RT-PCR conditions and primer sequences are summarized in Table 1.

### Western blot analysis

Cx43 expression and phosphorylation status were assessed by Western blot analysis using connexin 43 rabbit polyclonal antibody (Cell Signaling) or phospho-connexin 43 rabbit polyclonal antibody detecting serine 368 phosphorylated Cx43 (Cell Signaling) as described previously.[29] In subsets of experiments, HMEC-1 were pre-treated with the phosphokinase C (PKC) inhibitor bisindolylmaleimid during hypoxia or normoxia exposure (10 μM) [45].

**Table 1.** Human primer pairs used for real-time RT-PCR.

| Human   | Forward (5'–3')       | Reverse (5'–3')        | Product [bp] | Temp [C°] |
|---------|-----------------------|------------------------|--------------|-----------|
| β-actin | GGTGGCTTTTAGGATGGCAAG | ACTGGAACGGTGAAGGTGACAG | 162          | 56        |
| Cx 25   | CAGGCCTCTTGCCGATTGAG  | GTGGCCTCCACTTCTATCA    | 215          | 56        |
| Cx 26   | AAGAAGTCGCTTGGGAATTT  | GCTGAAGGGTAAAGCAAACA   | 177          | 56        |
| Cx 30   | TCCAGAAGGCAATACCAACC  | CAATGCTCC TTTGTCAAGCA  | 180          | 56        |
| Cx 30.3 | AGAGGTGCATGGAGATCTTC  | CAGCCTTCATTAGGACAGAG   | 135          | 56        |
| Cx 31   | CTTCCAGCAGCAGCAGGTCT  | CACCAGCCTGAGCACAGTTG   | 181          | 56        |
| Cx 31.1 | ATCTACCTGGTGAGCAAGAG  | GAGAGGAGGATGACTGTCTG   | 162          | 56        |
| Cx 31.3 | GAGAACCCTGCCTTGGTAGT  | TTGTGTCTTCTGGTCTCTC    | 214          | 56        |
| Cx 31.9 | GACCGTCTCTGTGCTTCT    | AGCAGCTTCTGCGCTCTTC    | 153          | 56        |
| Cx 32   | TCCGACAGCGTCTCCAATTA  | TTGTGGCCAGCAAGCACTAT   | 187          | 56        |
| Cx 36   | GCATCAAGGAGGTGGAATGT  | TTGAGTTCAGCCAGGTTGAG   | 112          | 56        |
| Cx 37   | CAACAGAGGGTCTTGAGAA   | CTGGAGAGGAAGCCGTAGTG   | 182          | 56        |
| Cx 40   | AGCAGGGGCAAGGAAATAGT  | TACAGAGACCAGGCCAATCC   | 162          | 56        |
| Cx 40.1 | GCCGTCTTACGCTCTATGT   | GAGGAGGAGGTGGATGATGT   | 180          | 56        |
| Cx 43   | AATCAGACAAGGCCACAG    | CATGGCTTGATTCCCTGACT   | 216          | 56        |
| Cx 45   | ACGCTTGGATCTGGCAGTTC  | TCAGTGAGCTGCTGCTTACC   | 209          | 56        |
| Cx 46   | TTCGAGCTGAAGCCGCTCTA  | CGCCAGCATGAAGATGATGA   | 111          | 56        |
| Cx 47   | GACCACCTGTGGATCTGAG   | CGGCTAAGGAGAAGGCTGAG   | 113          | 56        |
| Cx 50   | CTCCACTCCATTGCTGTCTC  | CGTAGGAAGGCAGTGTCTCT   | 217          | 56        |
| Cx 59   | AAGAGACCACAGCCTTAGGA  | AGGAGTCCAGTCTAGAAGGA   | 118          | 56        |
| Cx 60   | CAGTGAAGGCAGCATGAGAG  | TGACTGAAGGCAGAGGTGAG   | 197          | 56        |

doi:10.1371/journal.pone.0002801.t001

## Immunoprecipitation

Surface Cx43 expression was assessed as described previously. [29] In short, confluent HMEC-1 were exposed to normoxia or indicated time periods of hypoxia (2% oxygen). Monolayers were washed, surface proteins labeled with biotin, lysed and centrifugated to remove cell debris. Protein concentration was measured and immunoprecipitation was performed with 2 µg monoclonal rabbit anti-mouse connexin 43 antibody (Acris) and incubated overnight. Subsequently, 50 µl Protein G Microbeads (Miltenyi Biotec) were added and incubated for 30 minutes on ice. Magnetically separated immune complexes were eluted with 1× SDS gel loading buffer, transferred to nitrocellulose, and blocked overnight in washing buffer with 3% BSA and 2 µg/ml streptavidine. Membranes were enhanced by alkaline phosphatase.

## Data analysis

Data were compared by two-factor ANOVA, or by Student's *t* test where appropriate. Values are expressed as the mean±SD from at least three separate experiments. Standard deviation error bars at baseline (time point 0) reflect differences between different experiments.

## Results

### Extracellular ATP release from vascular endothelia is attenuated by hypoxia

To study the role of vascular endothelia in extracellular ATP release, we first measured the extracellular ATP content within the supernatant of vascular endothelia. For this purpose, the culture media from confluent HMEC-1 monolayers was replaced with calcium containing HBSS, and samples from the supernatant were

collected at indicated time points, in the presence of POM-1, a highly potent ENTPDase inhibitor [6,7]. As shown in Figure 1A, ATP levels within the supernatant immediately rise to approximately 90 nM and remained stable over the examined time period of 180 min. The present results are consistent with other studies that have measured ATP release from endothelial cells or fibroblasts. In these studies, the authors found maximal ATP levels at 10 min (their earliest measurement point, fibroblasts) or 30 min (endothelia) and no additional elevation at later points (e.g. at 60 min or 24 h). In fact, ATP levels were attenuated at these later measurement points. To rule out acute effects of changing the media (e.g. cell lysis initiated by media change), all further measurements were carried out 30 min after changing the media.

To study the influence of hypoxia on vascular ATP release, we pre-exposed over vascular endothelia (HMEC-1) over indicated periods to normoxia (21% oxygen) or ambient hypoxia (2% oxygen), the media was replaced and ATP content was measured within the supernatants after 30 min of incubation time. Surprisingly, we found that extracellular ATP levels were lower in supernatants derived from post-hypoxic endothelia in a time-dose dependent fashion, suggesting that endothelial ATP release is attenuated by hypoxia (Figure 1B). As next step, we lysed cells following different time-periods of hypoxia exposure and measured intracellular ATP levels. As shown in Figure 1C, intracellular ATP levels were unchanged in post-hypoxic endothelia. This is important, as changes in extracellular ATP release with hypoxia as shown in Figure 1B could be caused by attenuated intracellular ATP content, thereby resulting in an overall decrease in the transcellular ATP gradient during hypoxia. To study the degree of hypoxia that is necessary for attenuating endothelial ATP release, we next performed an oxygen-concentration dose-response curve with oxygen concentrations spanning the physiological range from

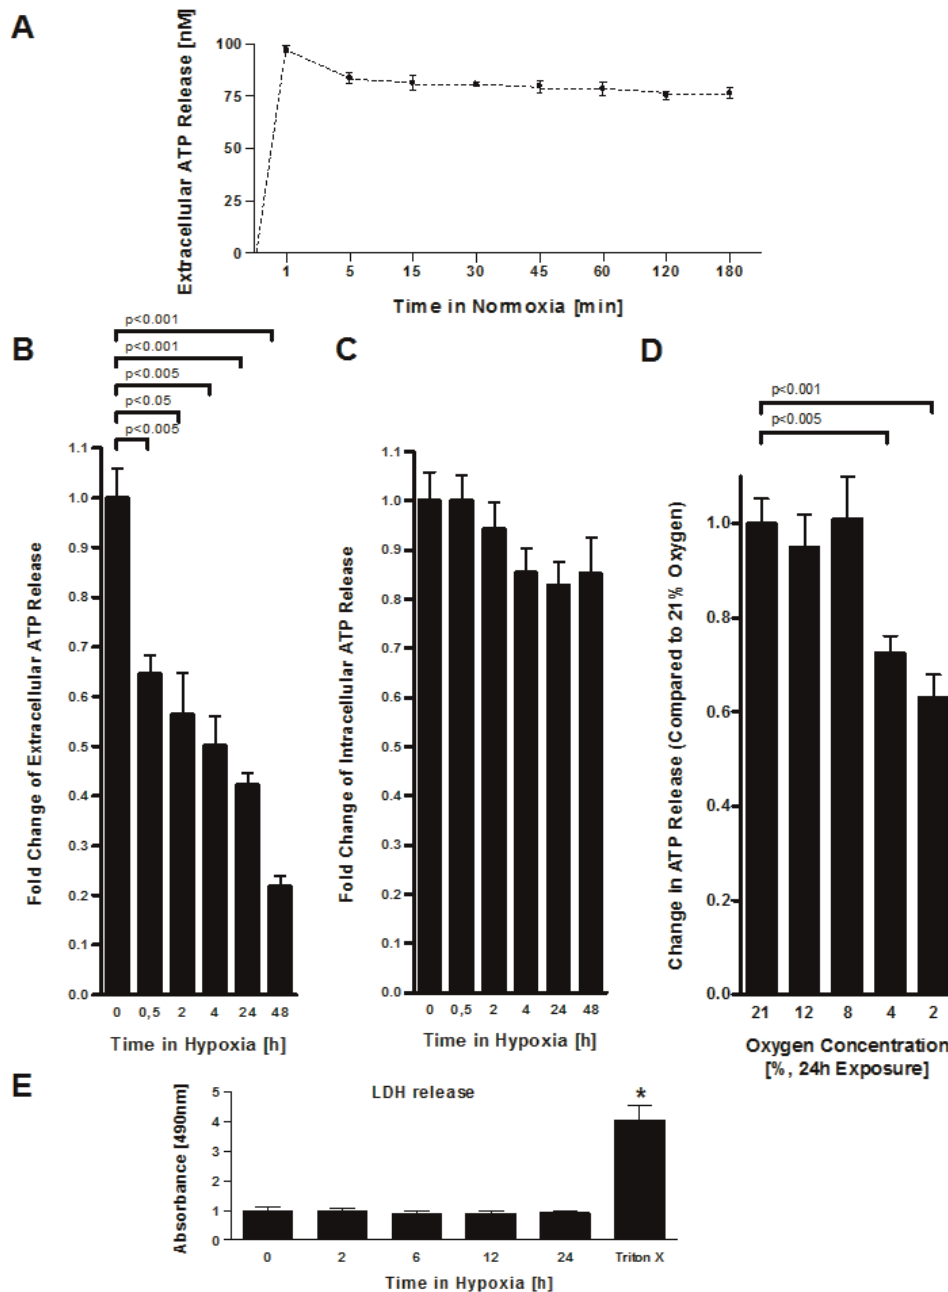

**Figure 1. Endothelial ATP release during hypoxia.** A, To study extracellular ATP release from normoxic endothelia, monolayers of confluent HMEC-1 were washed and the culture media was replaced with calcium containing HBSS. ATP content from their supernatant was sampled at indicated time points and quantified using a luminometric ATP detection assay. B, To measure extracellular ATP release under hypoxic conditions, confluent HMEC-1 monolayers were exposed to hypoxia (2% oxygen) over indicated time periods. Culture media was replaced with calcium containing HBSS and the ATP content within the supernatant was measured after 30 min incubation time. C, For intracellular ATP measurement, confluent HMEC-1 monolayers were exposed to hypoxia over indicated time periods, culture medium was discarded and cells were lysed by adding ice-cold water. ATP concentrations were measured as above. D, To measure the influence of different oxygen concentrations on endothelial ATP release, HMEC-1 were exposed to indicated degrees of hypoxia (21–2% of oxygen) over 24 h. Culture media was replaced with calcium containing HBSS and the ATP content within the supernatant was measured after 30 min incubation time. E, Confluent HMEC-1 monolayers were exposed to hypoxia as indicated. To assess lytic ATP release, LDH concentrations within the supernatant were measured by an LDH detection kit. In control experiments, cells were lysed with Triton X-100 (\* $p < 0.01$ ,  $n = 6$  for all experiments). doi:10.1371/journal.pone.0002801.g001

0 to 100 mmHg. For this purpose we exposed cultured endothelial cells (HMEC-1) over 24 h to indicated concentrations of oxygen, ranging from normoxia (21% oxygen) to severe hypoxia (2% oxygen). As shown in Figure 1D, attenuated ATP release occurred only with more severe hypoxia (4% or 2% oxygen over 24 h). To study the contribution of lytic ATP release, we measured LDH content in the supernatants of post-hypoxic endothelia. As shown

in Figure 1E, LDH content in the supernatant (obtained 30 min after changing the media) did not change significantly with hypoxia exposure, suggesting that lytic ATP release did not account for differences between normoxic or post-hypoxic endothelial ATP release. Taken together, these studies demonstrate that ambient hypoxia of vascular endothelia results in decreased extracellular ATP release.

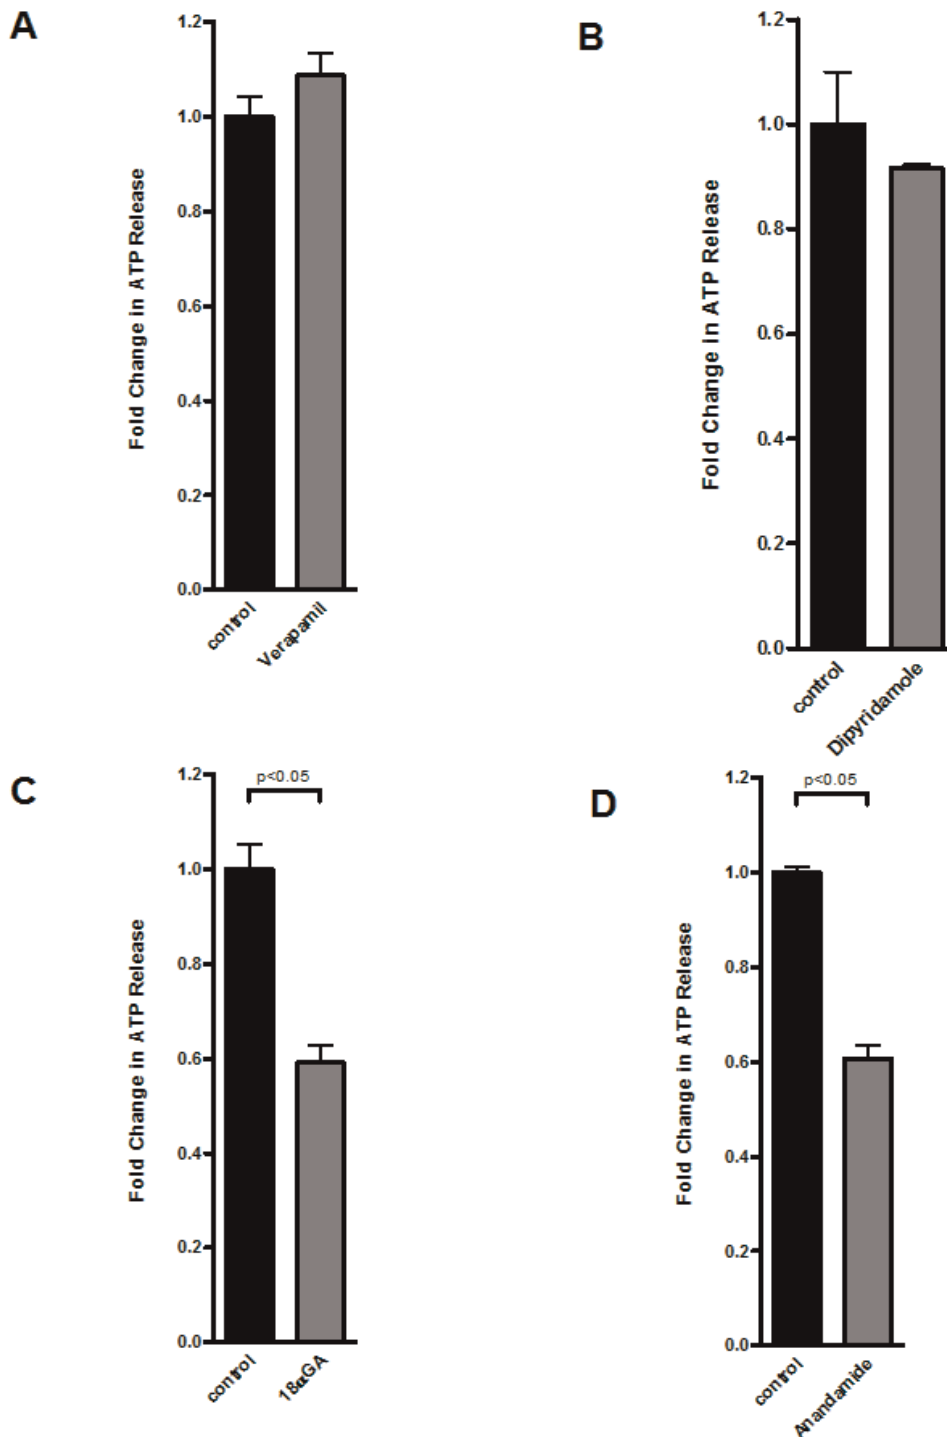

**Figure 2. Molecular mechanisms of endothelial-dependent ATP release.** A–D, Confluent HMEC-1 monolayers were washed and exposed to Verapamil (10  $\mu$ mol) or Dipyridamole (1  $\mu$ mol) over 20 min, 18- $\alpha$ -glycyrrhetic acid (18 $\alpha$ GA, 20  $\mu$ mol) or Anandamide (40  $\mu$ mol) over 10 min. ATP content within the supernatant was measured by a luminometric ATP detection assay and compared with untreated control cells ( $n=6$ ). doi:10.1371/journal.pone.0002801.g002

### Mechanisms of endothelial ATP release

ATP exists in the cytoplasm at millimolar concentrations[46] and can be released extracellularly by several mechanisms, including transport via connexin hemichannels, through nucleoside transporters, or direct transport through ATP-binding cassette (ABC) proteins.[29] As first step, we tested the effect of verapamil, an inhibitor of several ABC proteins and the multi drug resistance

gene product.[29] As shown in Figure 2A, we found no alteration in endothelial ATP release with verapamil treatment. Similarly, the nucleoside transport inhibitor dipyridamole had no effect on endothelial ATP release (Figure 2B). Next, we measured ATP release of endothelia in the presence or absence of the non-specific gap junction inhibitor 18 $\alpha$ GA.[29] As shown in Figure 2C, addition of 18 $\alpha$ GA resulted in a dramatic reduction of ATP



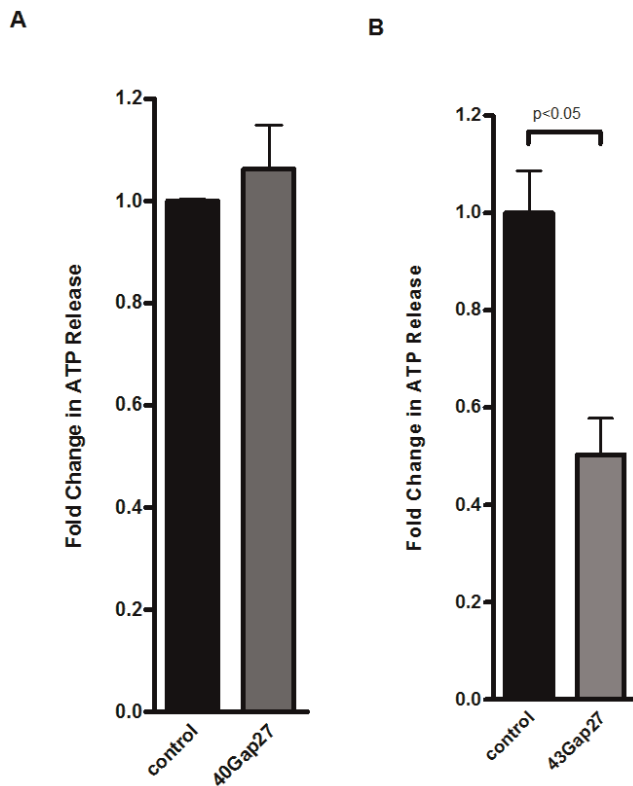

**Figure 3. Connexin-mimetic peptides in endothelial ATP release.** A, B, Confluent HMEC-1 monolayers were washed and treated with connexin-mimetic peptides (A: Cx40 peptide, SRPTEKNVFIV, 50  $\mu$ mol; B: Cx43 peptide, SRPTEKTIFIL, 50  $\mu$ mol). ATP content within the supernatant was measured by a luminometric ATP detection assay after an incubation period of 20 min and compared with control HMEC-1 treated with 50  $\mu$ M bovine albumin ( $n = 6$ ). doi:10.1371/journal.pone.0002801.g003

release from normoxic endothelia. Similarly, treatment with the non-specific gap junction inhibitor anandamide [29] resulted in attenuated ATP release (Figure 2D). We extended these findings to define specific connexin contributions to endothelial ATP release. For these purposes, we used previously described connexin mimetic peptides specifically directed against Cx40 or Cx43 [29,47]. As shown in Figure 3A, the Cx40-specific connexin mimetic peptide did not alter ATP liberation from endothelia. By contrast, the peptides which block Cx43 showed a significant inhibition of ATP liberation ( $50.0 \pm 7\%$  reduction,  $p < 0.01$  by ANOVA, Figure 3B). These results implicate Cx43 in ATP release from human endothelia.

#### Modulation of endothelial connexin expression by hypoxia

Based on our observations of attenuated ATP release by endothelia following hypoxia exposure and our data showing that gap-junctional inhibition is associated with attenuated endothelial ATP release, we next studied transcriptional consequences of hypoxia on endothelial connexin expression. Here, we first performed a transcriptional screen of known connexin molecules [48] using realtime RT-PCR to compare normoxic or hypoxic connexin expression of HMEC-1 (Table 1). Serendipitously, these studies revealed a selective repression of Cx43 transcript levels with hypoxia exposure (Figure 4, 2% oxygen, 12 h of hypoxia), while transcript levels of other connexins were not

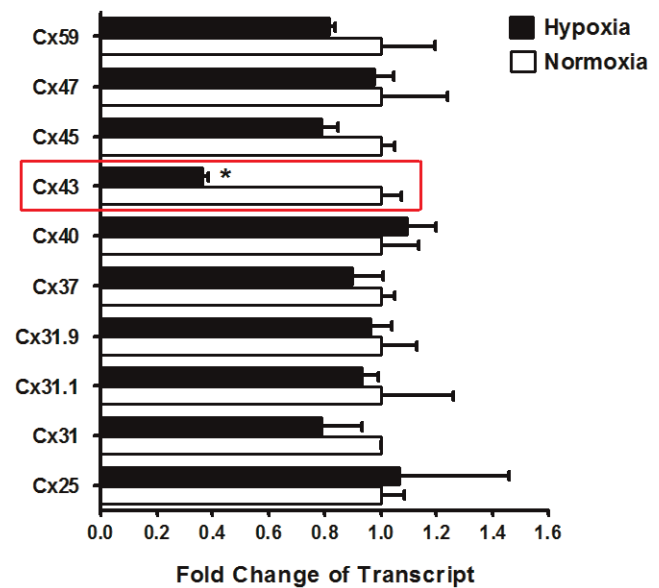

**Figure 4. Endothelial connexin expression.** Confluent HMEC-1 monolayers were exposed to normoxia or hypoxia (12 h). Total RNA was isolated and real-time reverse-transcriptase polymerase chain reaction was employed to screen for transcriptional modulation of connexin expression. Data were calculated relative to an internal control gene ( $\beta$ -actin) and are expressed as fold change over normoxia at each time point. Results are derived from 3 experiments in each condition. doi:10.1371/journal.pone.0002801.g004

observed. As shown in Figure 5A, these results could be confirmed with different time periods of hypoxia exposure (Figure 5A) and in a different human endothelial cell line (HMEC-1 and HUVECs, Figure 5A and B). The percentage of Cx43 repression and kinetics are slightly different between both cell types. However, the overall observation of significant repression of Cx43 expression with hypoxia is consistent between both cell lines. The reasons for these differences between HUVECs and HMEC-1 remain unclear to the authors. Western blot analysis showed time-dependent repression of Cx43 protein levels to the cell surface (Figure 5D). As previous studies had shown that PKC-dependent phosphorylation of the serin368 residue of Cx43 is associated with a functional change of Cx43 channels from the open to the closed state [37,49], we next studied Cx43-serine368 phosphorylation status by Western blot analysis using a serin368 phospho-specific antibody for Cx43. As shown in Figure 5E, hypoxia was also associated with increased phosphorylation of Cx43-Serine368. Consistent with previous reports, this response could be attenuated with the PKC inhibitor BIM (no changes in beta actin were observed, data not shown) [37,49]. Taken together these studies reveal hypoxia-dependent repression of Cx43 transcript in conjunction with increased phosphorylation of Cx43-Serine368, suggesting that hypoxia attenuates endothelial ATP release by transcriptional repression and phosphorylation of Cx43.

#### Functional consequences of Cx43 phosphorylation on endothelial ATP release

We next pursued studies to address whether hypoxia-associated phosphorylation of Cx43 contributes to attenuated ATP release from vascular endothelia. Here, we measured endothelial ATP release in following PKC inhibition with BIM to attenuate Cx43-Serine368 (see above) under normoxic or

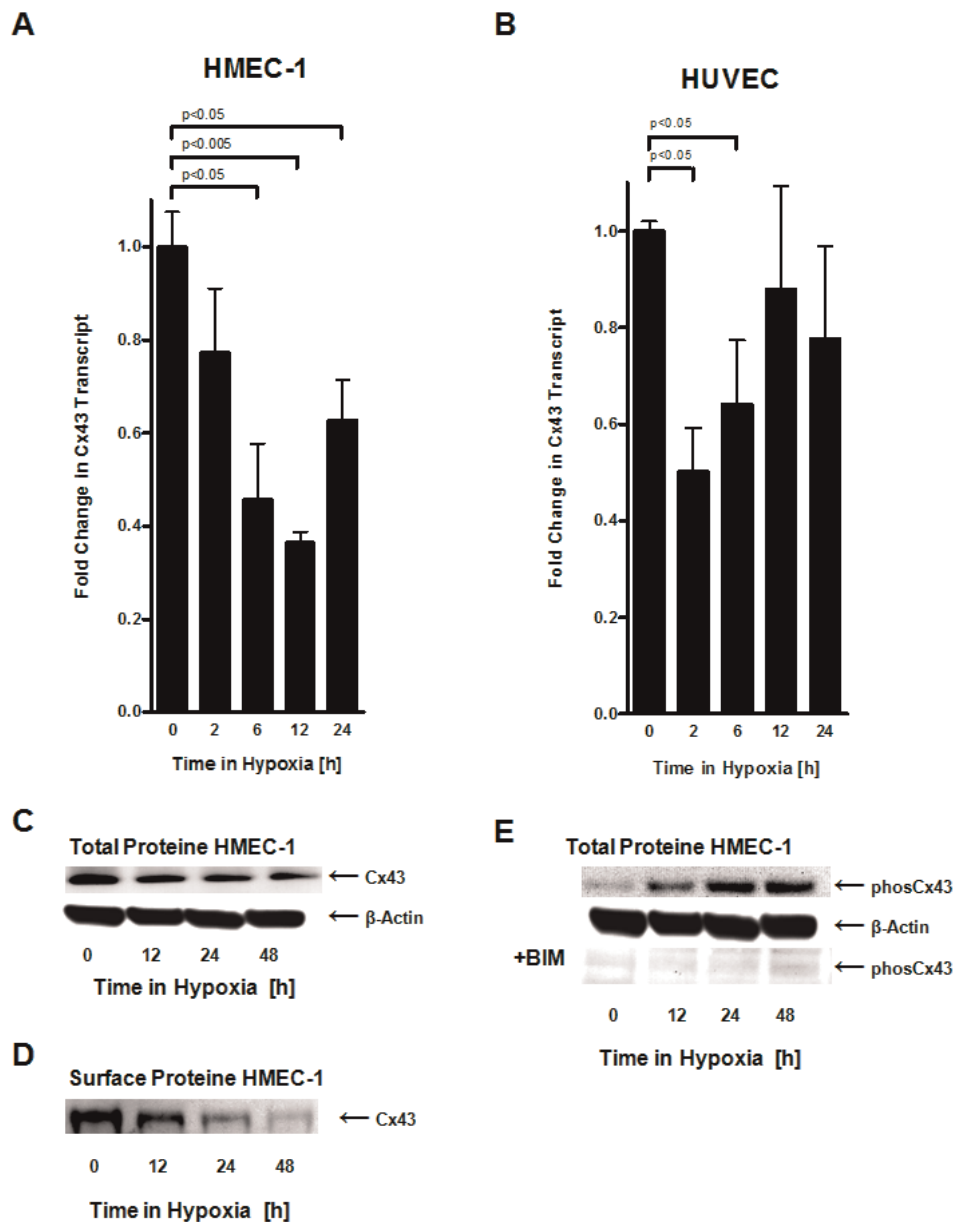

**Figure 5. Influence of hypoxia on Connexin 43 expression.** A, B. Confluent HMEC-1 or HUVEC monolayers were exposed to normoxia or hypoxia (2% oxygen) over indicated time periods. Total RNA was isolated and transcriptional responses were assessed by real-time reverse-transcriptase polymerase chain reaction. Data were calculated relative to an internal housekeeping gene ( $\beta$ -actin) and are expressed as fold change over normoxia at each time point. Results are derived from 3 experiments in each condition. C. Confluent HMEC-1 monolayers were exposed to hypoxia over indicated time periods. Cells were lysed and proteins were resolved by SDS-PAGE and transferred to PVDF-membrane. Membranes were probed with a connexin 43 antibody, proteins were detected by chemiluminescence. The same blot was reprobed for  $\beta$ -actin as a control for protein loading. A representative experiment of 3 is shown. D. Confluent HMEC-1 monolayers were exposed to hypoxia over indicated time periods. Monolayers were washed, surface proteins were biotinylated, and cells were lysed. Connexin 43 was immunoprecipitated, followed by addition of Protein G Microbeads. Proteins were resolved by SDS-PAGE and resultant Western blots were probed with Streptavidin. A representative experiment of 3 is shown. E. Confluent HMEC-1 monolayers were exposed to normoxia or hypoxia over indicated time periods. Cells were lysed and proteins were resolved by SDS-PAGE and transferred to PVDF-Membrane. Membranes were probed with phospho-connexin 43 antibody specific for phosphorylated ser368, and proteins were detected by chemiluminescence. The same blot was probed for  $\beta$ -actin as a control for protein loading. A representative of 3 is shown. In subsets of experiments, cells were pretreated with the protein kinase C inhibitor bisindolylmaleimide (10  $\mu$ M; +BIM). doi:10.1371/journal.pone.0002801.g005

hypoxic conditions (2% oxygen over 24 h). These studies revealed that already under normoxic conditions ATP release was significantly increased following PKC inhibition (Figure 6A) as compared to untreated normoxic HMEC-1 ( $p < 0.05$ ). While hypoxia exposure of untreated HMEC-1 was associated with a significant attenuation of ATP release ( $p < 0.001$ ), this response

was completely abolished following PKC inhibition with BIM. In fact, BIM treated HMEC-1 had higher ATP levels within the supernatant than untreated normoxic HMEC-1 ( $p < 0.05$ ). Taken together, these data suggest a functional contribution of Cx43 phosphorylation in attenuating endothelial ATP release during conditions of hypoxia.

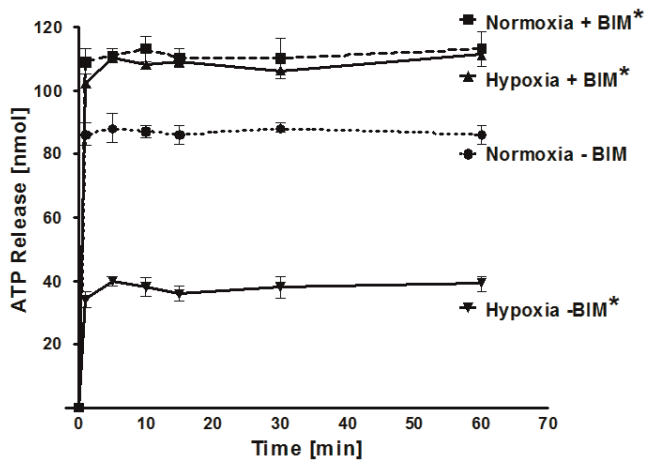

**Figure 6. ATP release from HMEC treated with the protein kinase C inhibitor bisindolylmaleimide (BIM).** To study the role of Cx43 ser398 phosphorylation status in ATP release from endothelia, monolayers of confluent HMEC-1 were treated with BIM (+BIM, 10  $\mu$ M) or vehicle control (-BIM), exposed to normoxia or hypoxia (24 h, 2% oxygen), washed and the culture media was replaced with calcium containing HBSS. ATP content from the supernatant was sampled at indicated time points and quantified using a luminometric ATP detection assay (\* $p < 0.05$  compared to Normoxia - BIM;  $n = 6$ ). doi:10.1371/journal.pone.0002801.g006

## Discussion

The present studies address the contribution of vascular endothelia to extracellular ATP elevations during conditions of hypoxia. While extracellular ATP levels are generally elevated during limited oxygen availability, [28] the results from our studies point out that endothelial ATP release is actually attenuated by hypoxia exposure. These findings suggest that other cellular sources (e.g. platelets, red blood cells or inflammatory cells) [29,35,38,39] could account for extracellular ATP elevations during limited oxygen availability or provide a “trigger” for other cells to release ATP. In addition, the present studies address molecular mechanisms involved in endothelial ATP release. Consistent with previous studies suggesting a potential role of endothelial Cx43 hemichannels in extracellular ATP release [47], the present studies point towards a critical role of Cx43 in endothelial-dependent ATP release. Moreover, endothelial hypoxia results in transcriptional repression of Cx43 in conjunction with increased phosphorylation status of Cx43- ser368, thereby resulting in hypoxia-associated attenuation of ATP-release.

In contrast to the present studies, a previous study of endothelial ATP release during hypoxia found increased extracellular ATP release from pulmonary endothelia following hypoxia exposure [28]. Why these results are different from the present studies is currently unclear. A possible explanation may involve the fact, that pulmonary endothelia that were used in the studies by Gerasimovskaya et al. may be different in their responses to hypoxia than vascular endothelial cells that were used in the present studies (e.g. HMEC-1). As such, baseline levels of ATP release measured in the present studies of HMEC-1 were close to 100 nM, whereas baseline ATP levels measured by Gerasimovskaya et al. in pulmonary endothelia were approximately 0.2 nM. Moreover, differences in the dynamics of extracellular ATP metabolism in different cellular models or hypoxic conditions could also contribute to the differences between both studies. In addition, one has to keep in mind that both studies did not really measure a release rate but an instantaneous concentration that will be the

result of a complex mixture of cell volume, media volume, and degradation rates compared to release rates, thus making it difficult to compare both experimental settings.

The findings from the present studies highlight the role of extracellular ATP release as part of a crosstalk pathway between different cell-types during conditions of hypoxia. The fact that endothelial ATP release is attenuated following hypoxia exposure suggests that other cellular components of the vasculature (e.g. smooth muscle cells, fibroblasts, platelets, red blood cells or inflammatory cells) [29,35,38,39] have to account for hypoxia-associated increase in extracellular ATP. For example, non-resident cells like PMN that participate in an endothelial-neutrophil dependent crosstalk may therefore represent an important source of extracellular ATP [25]. In fact, extracellular ATP can be rapidly metabolized to adenosine by hypoxia-induced ectonucleotidases (CD39, ecto-apyrase, conversion of ATP to AMP and CD73, ecto-5'-nucleotidase, AMP to adenosine) expressed on the endothelial surface, thereby contributing to endothelial adaptation to hypoxia. In fact, different studies have shown that during conditions of hypoxia or ischemia, the main source of extracellular adenosine stems from phosphohydrolysis of precursor molecules, particularly ATP [5–8,26]. For example studies in mice deficient in extracellular adenosine generation (*cd73<sup>-/-</sup>* or *cd39<sup>-/-</sup>* mice) [26,50] revealed dramatic increases in vascular leakage and pulmonary edema when mice were exposed to ambient hypoxia (8% of oxygen over 4 h) [26,50]. In addition, a recent study of vascular responses to hypoxia compared genotyped mice for each individual adenosine receptor (AR, A1AR, A2AAR, A2BAR or A3AR) showing a barrier-protective role of signaling through the A2BAR in attenuating vascular leakage during hypoxia [27]. Moreover, these studies found resuscitation of endothelial barrier defects associated with hypoxia by A2BAR agonist treatment. While our results suggest that the general elevation of ATP levels observed in hypoxia may emanate from other cellular sources, it is important to point out that erythrocytes and platelets lack connexins [51], and thus Cx hemichannels detract from the importance of such channels in enucleate cells. Taken together, other cellular sources than endothelia and other molecular mechanisms than Cx43-dependent ATP release are likely to contribute to elevating extracellular ATP levels with hypoxia.

Some limitations of the present studies need to be pointed out. The essence of this paper is that reduced release of ATP is atypical. However, a cultured endothelial cell line is not strictly “endothelium”. These cells in a blood vessel interact extensively and multidimensionally with each other and also with smooth muscle cells and thus it is, after all, a model. In addition, it is may be surprising to see on the one hand a very strong effect of PKC inhibition (Fig 6) and on the other hand a downregulation (Fig. 5) of Cx43. For example, if Cx43 is downregulated, how can it be assumed that PKC inhibition prevents the ATP release? However, similar observations in other models have been made previously. For example, hypoxia is associated with transcriptional repression of equilibrative nucleoside transporters, particularly ENT1 thereby resulting in attenuated adenosine uptake from the extracellular space and enhanced adenosine signaling effects [22,23]. However, pharmacological inhibition of nucleoside transporters can be used therapeutically. In this study, treatment with the nucleoside transport inhibitor dipyridamole was associated with attenuated vascular leakage during ambient hypoxia exposure of mice (8% oxygen, 4 h exposure time) [23].

Taken together, the present studies define an important contribution of endothelial Cx43 to extracellular ATP release and reveal transcription and phosphorylation dependent attenu-



ation of extracellular ATP release from vascular endothelia during conditions of limited oxygen availability.

## References

- Fredholm BB (2007) Adenosine, an endogenous distress signal, modulates tissue damage and repair. *Cell Death Differ* 14: 1315–1323.
- Sitkovsky MV, Lukashev D, Apasov S, Kojima H, Koshiba M, et al. (2004) Physiological control of immune response and inflammatory tissue damage by hypoxia-inducible factors and adenosine A2A receptors. *Annual Review of Immunology* 22: 657–682.
- Sitkovsky M, Lukashev D (2005) Regulation of immune cells by local-tissue oxygen tension: HIF1 alpha and adenosine receptors. *Nat Rev Immunol* 5: 712–721.
- Van Linden A, Eltzschig HK (2007) Role of pulmonary adenosine during hypoxia: extracellular generation, signaling and metabolism by surface adenosine deaminase/CD26. *Expert Opin Biol Ther* 7: 1437–1447.
- Grenz A, Zhang H, Eckle T, Mittelbronn M, Wehrmann M, et al. (2007) Protective role of ecto-5'-nucleotidase (CD73) in renal ischemia. *J Am Soc Nephrol* 18: 833–845.
- Grenz A, Zhang H, Hermes M, Eckle T, Klingel K, et al. (2007) Contribution of E-NTPDase1 (CD39) to renal protection from ischemia-reperfusion injury. *FASEB J* 21: 2863–2873.
- Kohler D, Eckle T, Faigle M, Grenz A, Mittelbronn M, et al. (2007) CD39/ectonucleoside triphosphate diphosphohydrolase 1 provides myocardial protection during cardiac ischemia/reperfusion injury. *Circulation* 116: 1784–1794.
- Eckle T, Krahn T, Grenz A, Kohler D, Mittelbronn M, et al. (2007) Cardioprotection by ecto-5'-nucleotidase (CD73) and A2B adenosine receptors. *Circulation* 115: 1581–1590.
- Eckle T, Fullbier L, Wehrmann M, Khoury J, Mittelbronn M, et al. (2007) Identification of ectonucleosidases CD39 and CD73 in innate protection during acute lung injury. *J Immunol* 178: 8127–8137.
- Hart ML, Henn M, Kohler D, Kloor D, Mittelbronn M, et al. (2008) Role of extracellular nucleotide phosphohydrolysis in intestinal ischemia-reperfusion injury. *FASEB J*.
- Eckle T, Kohler D, Lehmann R, El Kasmi KC, Eltzschig HK (2008) Hypoxia-Inducible Factor-1 Is Central to Cardioprotection: A New Paradigm for Ischemic Preconditioning. *Circulation* 118: 166–175.
- Eltzschig HK, Macmanus CF, Colgan SP (2008) Neutrophils as Sources of Extracellular Nucleotides: Functional Consequences at the Vascular Interface. *Trends Cardiovasc Med* 18: 103–107.
- Grenz A, Osswald H, Eckle T, Yang D, Zhang H, et al. (2008) The Renal Vascular A2B Adenosine Receptor Protects the Kidney from Ischemia. *PLoS Medicine* 5: e137.
- Hart ML, Kohler D, Eckle T, Kloor D, Stahl GL, et al. (2008) Direct Treatment of Mouse or Human Blood With Soluble 5'-Nucleotidase Inhibits Platelet Aggregation. *Arterioscler Thromb Vasc Biol*.
- Hart ML, Much C, Kohler D, Schittenhelm J, Gorzolla IC, et al. (2008) Use of a hanging-weight system for liver ischemic preconditioning in mice. *Am J Physiol Gastrointest Liver Physiol*.
- Morote-Garcia JC, Rosenberger P, Kuhlicke J, Eltzschig HK (2008) HIF-1-dependent repression of adenosine kinase attenuates hypoxia-induced vascular leak. *Blood*.
- Eckle T, Faigle M, Grenz A, Laucher S, Thompson LF, et al. (2008) A2B adenosine receptor dampens hypoxia-induced vascular leak. *Blood* 111: 2024–2035.
- Linden J (2005) Adenosine in tissue protection and tissue regeneration. *Mol Pharmacol* 67: 1385–1387.
- Ohta A, Sitkovsky M (2001) Role of G-protein-coupled adenosine receptors in downregulation of inflammation and protection from tissue damage. *Nature* 414: 916–920.
- Erlinge D (2004) Extracellular ATP: a central player in the regulation of vascular smooth muscle phenotype. Focus on "Dual role of PKA in phenotype modulation of vascular smooth muscle cells by extracellular ATP". *Am J Physiol Cell Physiol* 287: C260–262.
- Weissmuller T, Eltzschig HK, Colgan SP (2005) Dynamic purine signaling and metabolism during neutrophil-endothelial interactions. *Purinergic Signalling* 1: 229–239.
- Löffler M, Morote-Garcia JC, Eltzschig SA, Coe IR, Eltzschig HK (2007) Physiological roles of vascular nucleoside transporters. *Arterioscler Thromb Vasc Biol* 27: 1004–1013.
- Eltzschig HK, Abdulla P, Hoffman E, Hamilton KE, Daniels D, et al. (2005) HIF-1-dependent repression of equilibrative nucleoside transporter (ENT) in hypoxia. *J Exp Med* 202: 1493–1505.
- Eltzschig HK, Faigle M, Knapp S, Karhausen J, Ibla J, et al. (2006) Endothelial catabolism of extracellular adenosine during hypoxia: the role of surface adenosine deaminase and CD26. *Blood* 108: 1602–1610.
- Eltzschig HK, Thompson LF, Karhausen J, Cotta RJ, Ibla JC, et al. (2004) Endogenous adenosine produced during hypoxia attenuates neutrophil accumulation: coordination by extracellular nucleotide metabolism. *Blood* 104: 3986–3992.
- Eltzschig HK, Ibla JC, Furuta GT, Leonard MO, Jacobson KA, et al. (2003) Coordinated adenosine nucleotide phosphohydrolysis and nucleoside signaling in posthypoxic endothelium: role of ectonucleotidases and adenosine A2B receptors. *J Exp Med* 198: 783–796.
- Eckle T, Faigle M, Grenz A, Laucher S, Thompson LF, et al. (2007) A2B adenosine receptor dampens hypoxia-induced vascular leak. *Blood*.
- Gerasimovskaya EV, Ahmad S, White CW, Jones PL, Carpenter TC, et al. (2002) Extracellular ATP is an autocrine/paracrine regulator of hypoxia-induced adventitial fibroblast growth. Signaling through extracellular signal-regulated kinase-1/2 and the Egr-1 transcription factor. *J Biol Chem* 277: 44638–44650.
- Eltzschig HK, Eckle T, Mager A, Kuper N, Karcher C, et al. (2006) ATP release from activated neutrophils occurs via connexin 43 and modulates adenosine-dependent endothelial cell function. *Circ Res* 99: 1100–1108.
- Burnstock G (2002) Purinergic Signaling and Vascular Cell Proliferation and Death. *Arterioscler Thromb Vasc Biol* 22: 364–373.
- Wang ECY, Lee J-M, Ruiz WG, Balestreire EM, von Bodungen M, et al. (2005) ATP and purinergic receptor-dependent membrane traffic in bladder umbrella cells. *J Clin Invest* 115: 2412–2422.
- Stout CE, Costantin JL, Naus CCG, Charles AC (2002) Intercellular Calcium Signaling in Astrocytes via ATP Release through Connexin Hemichannels. *J Biol Chem* 277: 10482–10488.
- Goodenough DA, Paul DL (2003) Beyond the gap: functions of unpaired connexon channels. *Nat Rev Mol Cell Biol* 4: 285–294.
- Linden J (2006) Purinergic Chemotaxis. *Science* 314: 1689–1690.
- Chen Y, Corriden R, Inoue Y, Yip L, Hashiguchi N, et al. (2006) ATP Release Guides Neutrophil Chemotaxis via P2Y2 and A3 Receptors. *Science* 314: 1792–1795.
- Tong D, Li TY, Naus KE, Bai D, Kidder GM (2007) In vivo analysis of unlocked connexin43 gap junction hemichannels in ovarian granulosa cells. *J Cell Sci* 120: 4016–4024.
- Lampe PD, TenBroek EM, Burt JM, Kurata WE, Johnson RG, et al. (2000) Phosphorylation of Connexin43 on Serine368 by Protein Kinase C Regulates Gap Junctional Communication. *J Cell Biol* 149: 1503–1512.
- Wang L, Olivecrona G, Gotberg M, Olsson ML, Winzell MS, et al. (2005) ADP acting on P2Y13 receptors is a negative feedback pathway for ATP release from human red blood cells. *Circ Res* 96: 189–196.
- Fredholm BB (1997) Purines and neutrophil leukocytes. *Gen Pharmacol* 28: 345–350.
- Robinson KA, Candal FJ, Scott NA, Ades EW (1995) Seeding of vascular grafts with an immortalized human dermal microvascular endothelial cell line. *Angiology* 46: 107–113.
- Ades EW, Candal FJ, Swerlick RA, George VG, Summers S, et al. (1992) HMEC-1: establishment of an immortalized human microvascular endothelial cell line. *J Invest Dermatol* 99: 683–690.
- Kuhlicke J, Frick JS, Morote-Garcia JC, Rosenberger P, Eltzschig HK (2007) Hypoxia Inducible Factor (HIF)-1 Coordinates Induction of Toll-Like Receptors TLR2 and TLR6 during Hypoxia. *PLoS ONE* 2: e1364.
- Eltzschig HK, Weissmuller T, Mager A, Eckle T (2006) Nucleotide metabolism and cell-cell interactions. *Methods Mol Biol* 341: 73–87.
- Evans WH, Boitano S (2001) Connexin mimetic peptides: specific inhibitors of gap-junctional intercellular communication. *Biochem Soc Trans* 29: 606–612.
- Huang NK, Lin YW, Huang CL, Messing RO, Chern Y (2001) Activation of protein kinase A and atypical protein kinase C by A(2A) adenosine receptors antagonizes apoptosis due to serum deprivation in PC12 cells. *J Biol Chem* 276: 13838–13846.
- Novak I (2003) ATP as a Signaling Molecule: the Exocrine Focus. *News Physiol Sci* 18: 12–17.
- Leybaert L, Braet K, Vandamme W, Cabooter L, Martin PE, et al. (2003) Connexin channels, connexin mimetic peptides and ATP release. *Cell Commun Adhes* 10: 251–257.
- Sohl G, Willecke K (2004) Gap junctions and the connexin protein family. *Cardiovasc Res* 62: 228–232.
- Ek-Vitorin JF, King TJ, Heyman NS, Lampe PD, Burt JM (2006) Selectivity of connexin 43 channels is regulated through protein kinase C-dependent phosphorylation. *Circ Res* 98: 1498–1505.
- Thompson LF, Eltzschig HK, Ibla JC, Van De Wiele CJ, Resta R, et al. (2004) Crucial role for ecto-5'-nucleotidase (CD73) in vascular leakage during hypoxia. *J Exp Med* 200: 1395–1405.
- Locovei S, Bao L, Dahl G (2006) Pannexin 1 in erythrocytes: function without a gap. *Proc Natl Acad Sci U S A* 103: 7655–7659.

## Author Contributions

Conceived and designed the experiments: MF JS HKE. Performed the experiments: MF JS SZ KCEK HKE. Analyzed the data: MF JS SZ KCEK HKE. Wrote the paper: MF JS KCEK HKE.
